# Supplementary material for: Calculation of enthalpies of formation and band gaps of polymeric binders
Source: Royal Society of Chemistry journal article supplement (doi:10.1039/c4ra02847c), 2014-01-01
Supplement: c4ra02847c1.pdf [file c4ra02847c1.pdf]

**Electronic Supplementary Data**

# **On Calculating Polymeric Binders' Enthalpy of Formations and Band Gaps with Computational Methods**

Md Abdul Shafeeuulla Khan,\* Abhijit Dey, Javaid Athar, Arun Kanti Sikder\*

*Energetic Materials Research Division, High Energy Materials Research Laboratory (Defence Research & Development Organization), Pune, India-411 021.*

\*Corresponding Authors. Fax: (+91)-20-25869316, E-mail: [maskhan@hemrl.drdo.in](mailto:maskhan@hemrl.drdo.in)  
[aksikder@hemrl.drdo.in](mailto:aksikder@hemrl.drdo.in).

## **Table of content**

| <b>S. No.</b> | <b>Entry name</b>        | <b>Page No.</b> |
|---------------|--------------------------|-----------------|
| 1.            | <b>Monomer of HTPB</b>   | S2              |
| 2.            | <b>Dimer of HTPB</b>     | S2              |
| 3.            | <b>Trimer of HTPB</b>    | S2              |
| 4.            | <b>Tetramer of HTPB</b>  | S3              |
| 5.            | <b>Pentamer of HTPB</b>  | S4              |
| 6.            | <b>Monomer of GAP</b>    | S5              |
| 7.            | <b>Dimer of GAP</b>      | S5              |
| 8.            | <b>Trimer of GAP</b>     | S6              |
| 9.            | <b>Tetramer of GAP</b>   | S7              |
| 10.           | <b>Pentamer of GAP</b>   | S8              |
| 11.           | <b>Monomer of AHTPB</b>  | S9              |
| 12.           | <b>Dimer of AHTPB</b>    | S9              |
| 13.           | <b>Trimer of AHTPB</b>   | S10             |
| 14.           | <b>Tetramer of AHTPB</b> | S11             |
| 15.           | <b>Pentamer of AHTPB</b> | S12             |
| 16.           | <b>PBC-HTPB</b>          | S14             |
| 17.           | <b>PBC-GAP</b>           | S14             |
| 18.           | <b>PBC-AHTPB</b>         | S15             |

**Cartesian coordinates of all B3LYP/6-31G(d) optimized stationary points of monomer, dimer, trimer tetramer and pentamers of HTPB, GAP and AHTPB in the gas phase, including corresponding charge and multiplicity were given.**

**Monomer of HTPB**

Charge = 0; Multiplicity = 1

|   |             |             |             |
|---|-------------|-------------|-------------|
| C | -0.56300300 | -0.15713400 | 0.32174200  |
| H | -0.57208800 | -0.97227800 | 1.04580700  |
| C | 0.56277400  | 0.15722900  | -0.32033300 |
| H | 0.57185700  | 0.97238700  | -1.04438100 |
| C | 1.87224100  | -0.54903000 | -0.13742800 |
| H | 1.78624600  | -1.30346700 | 0.66071000  |
| C | -1.87251000 | 0.54894600  | 0.13848900  |
| H | -1.78572800 | 1.30503000  | -0.65800000 |
| H | -2.13044300 | 1.08191700  | 1.07033500  |
| O | -2.87082100 | -0.42587300 | -0.16806500 |
| H | -3.73215200 | 0.01769700  | -0.13453400 |
| O | 2.87135400  | 0.42597100  | 0.16573700  |
| H | 3.73242400  | -0.01810800 | 0.13242700  |
| H | 2.12861100  | -1.08402600 | -1.06855200 |

**Dimer of HTPB**

Charge = 0; Multiplicity = 1

|   |             |             |             |
|---|-------------|-------------|-------------|
| C | 0.54523900  | 0.47963500  | 0.26968800  |
| H | 0.22235600  | 0.84815700  | 1.25412800  |
| H | 0.61993200  | 1.35682500  | -0.38606800 |
| C | 4.31207800  | -0.52211000 | -0.17251300 |
| H | 4.55197800  | -0.99621300 | -1.14060800 |
| H | 4.25582400  | -1.32584300 | 0.57943100  |
| C | 2.99020900  | 0.17716500  | -0.27417800 |
| H | 2.96530900  | 1.02883800  | -0.95491500 |
| C | 1.89039200  | -0.18068500 | 0.39247600  |
| H | 1.94378100  | -1.03021900 | 1.07742900  |
| C | -0.54520400 | -0.47928800 | -0.26935700 |
| H | -0.22234600 | -0.84776200 | -1.25382300 |
| H | -0.61985400 | -1.35651000 | 0.38636100  |
| C | -1.89038800 | 0.18101100  | -0.39207300 |
| H | -1.94366700 | 1.03087100  | -1.07664200 |
| C | -2.99025300 | -0.17724800 | 0.27424800  |
| H | -2.96539400 | -1.02927600 | 0.95452400  |
| C | -4.31222400 | 0.52185900  | 0.17259100  |
| H | -4.55254100 | 0.99538900  | 1.14087100  |
| H | -4.25585700 | 1.32603600  | -0.57887300 |
| O | -5.31021400 | -0.44326900 | -0.16554600 |
| H | -6.17446200 | -0.01330800 | -0.07545700 |
| O | 5.31038100  | 0.44304200  | 0.16473500  |
| H | 6.17451000  | 0.01279400  | 0.07484000  |

**Trimer of HTPB**

Charge = 0; Multiplicity = 1

|   |             |             |             |
|---|-------------|-------------|-------------|
| C | -1.89530700 | -0.46888200 | -0.24735600 |
| H | -2.20948700 | -0.80606100 | -1.24607400 |
| H | -1.83016300 | -1.36753200 | 0.38036800  |
| C | 1.89530800  | 0.46888300  | 0.24735700  |
| H | 2.20948800  | 0.80606100  | 1.24607500  |
| H | 1.83016300  | 1.36753400  | -0.38036500 |

|   |             |             |             |
|---|-------------|-------------|-------------|
| C | 0.54698300  | -0.19286600 | 0.33142600  |
| H | 0.48603300  | -1.06896500 | 0.98181300  |
| C | -0.54698300 | 0.19286600  | -0.33142500 |
| H | -0.48603300 | 1.06896600  | -0.98181200 |
| C | -2.99109700 | 0.47289500  | 0.31049400  |
| H | -2.67802800 | 0.80915600  | 1.30948900  |
| H | -3.05757300 | 1.37099200  | -0.31727700 |
| C | 2.99109600  | -0.47289400 | -0.31049400 |
| H | 3.05757200  | -1.37099100 | 0.31727500  |
| H | 2.67802700  | -0.80915300 | -1.30949000 |
| C | 4.33814200  | 0.18903900  | -0.39786900 |
| H | 4.39979700  | 1.05931000  | -1.05568200 |
| C | 5.43081000  | -0.18994500 | 0.26895300  |
| H | 5.39851900  | -1.06225300 | 0.92271900  |
| C | -4.33814200 | -0.18903800 | 0.39786900  |
| H | -4.39979700 | -1.05930800 | 1.05568300  |
| C | -5.43081000 | 0.18994500  | -0.26895400 |
| H | -5.39851900 | 1.06225200  | -0.92272100 |
| C | 6.75387000  | 0.51129300  | 0.20219300  |
| H | 6.70499200  | 1.33815600  | -0.52479500 |
| H | 6.98486500  | 0.95474000  | 1.18687100  |
| C | -6.75387000 | -0.51129400 | -0.20219300 |
| H | -6.98486500 | -0.95474200 | -1.18687100 |
| H | -6.70499100 | -1.33815600 | 0.52479600  |
| O | -7.75537500 | 0.44318400  | 0.15560400  |
| H | -8.61857200 | 0.01609900  | 0.04417900  |
| O | 7.75537500  | -0.44318500 | -0.15560500 |
| H | 8.61857200  | -0.01610000 | -0.04418000 |

#### Tetramer of HTPB

Charge = 0; Multiplicity = 1

|   |             |             |             |
|---|-------------|-------------|-------------|
| C | 4.32269400  | -0.49943700 | -0.12225300 |
| H | 4.65977500  | -1.39132900 | 0.42621100  |
| H | 4.26033400  | -0.78760900 | -1.18009500 |
| C | 0.50952200  | 0.44854800  | 0.11365900  |
| H | 0.17131300  | 1.33943800  | -0.43547600 |
| H | 0.57135700  | 0.73785900  | 1.17119000  |
| C | 1.86658900  | 0.02721000  | -0.37995100 |
| H | 1.93020600  | -0.22539900 | -1.44137500 |
| C | 2.96606700  | -0.07702300 | 0.37190700  |
| H | 2.90308200  | 0.17575200  | 1.43324200  |
| C | 5.39418900  | 0.60570600  | 0.04976800  |
| H | 5.05967300  | 1.49643700  | -0.50130200 |
| H | 5.45634700  | 0.89484900  | 1.10696300  |
| C | -0.56096800 | -0.65754000 | -0.05706600 |
| H | -0.62257600 | -0.94672300 | -1.11466500 |
| H | -0.22247900 | -1.54848500 | 0.49197500  |
| C | -1.91843300 | -0.23693000 | 0.43620500  |
| H | -1.98270600 | 0.01536000  | 1.49765800  |
| C | -3.01744000 | -0.13293300 | -0.31639700 |
| H | -2.95312200 | -0.38457600 | -1.37794400 |
| C | 6.75003100  | 0.18360000  | -0.44396200 |
| H | 6.81591000  | -0.05970600 | -1.50716400 |
| C | 7.84602000  | 0.06915400  | 0.30964500  |
| H | 7.80925400  | 0.31736700  | 1.37097900  |

|   |              |             |             |
|---|--------------|-------------|-------------|
| C | -4.37488000  | 0.28841300  | 0.17633700  |
| H | -4.31419900  | 0.57656200  | 1.23425500  |
| H | -4.71314600  | 1.17922400  | -0.37249000 |
| C | 9.17844900   | -0.39869500 | -0.19271600 |
| H | 9.42919100   | -1.36607700 | 0.27728300  |
| H | 9.13231800   | -0.56691500 | -1.28095300 |
| O | 10.16095700  | 0.58245800  | 0.14511900  |
| H | 11.03168900  | 0.20103200  | -0.04529100 |
| C | -5.44385000  | -0.81856200 | 0.00318600  |
| H | -5.50275100  | -1.11063700 | -1.05344000 |
| H | -5.10888100  | -1.70825800 | 0.55637000  |
| C | -6.80124600  | -0.39449200 | 0.49098300  |
| H | -6.86473600  | -0.12166400 | 1.54716400  |
| C | -7.90281600  | -0.31769800 | -0.25915000 |
| H | -7.86190300  | -0.56926200 | -1.31953300 |
| C | -9.25336500  | 0.08350500  | 0.25215100  |
| H | -9.94006000  | -0.77941300 | 0.19404500  |
| H | -9.18321800  | 0.37342700  | 1.31318600  |
| O | -9.74253900  | 1.15761600  | -0.55372600 |
| H | -10.67140100 | 1.30120400  | -0.31600900 |

#### Pentamer of HTPB

Charge = 0; Multiplicity = 1

|   |              |              |             |
|---|--------------|--------------|-------------|
| C | -6.76877300  | -0.45341500  | -0.23091800 |
| H | -7.06625500  | -0.82626500  | -1.22209000 |
| H | -6.68746000  | -1.33230200  | 0.42241800  |
| C | -3.00148200  | 0.57331100   | 0.27006500  |
| H | -2.69494700  | 0.92046700   | 1.26763500  |
| H | -3.07974600  | 1.46744500   | -0.36253100 |
| C | -4.33821600  | -0.111108400 | 0.35662000  |
| H | -4.38692700  | -0.97504000  | 1.02420700  |
| C | -5.43531500  | 0.23732500   | -0.32157200 |
| H | -5.38921100  | 1.10057100   | -0.99006100 |
| C | -7.89243500  | 0.47587500   | 0.29128400  |
| H | -7.59125500  | 0.85778600   | 1.27740800  |
| H | -7.98462300  | 1.34765900   | -0.36938600 |
| C | -1.88985100  | -0.35354000  | -0.28096400 |
| H | -1.83113500  | -1.26065100  | 0.33524300  |
| H | -2.18597800  | -0.67931800  | -1.28898400 |
| C | -0.54237700  | 0.31355100   | -0.33133600 |
| H | -0.47533800  | 1.20929400   | -0.95390200 |
| C | 0.54476000   | -0.09310800  | 0.33037100  |
| H | 0.47533600   | -0.98972300  | 0.95145100  |
| C | -9.21903400  | -0.22274100  | 0.40279100  |
| H | -9.25617200  | -1.06623000  | 1.09636700  |
| C | -10.32042400 | 0.09307000   | -0.28231300 |
| H | -10.31328900 | 0.93761600   | -0.97226200 |
| C | 1.89607600   | 0.56595800   | 0.28318500  |
| H | 1.83814800   | 1.49653900   | -0.29700700 |
| H | 2.20922500   | 0.84866900   | 1.29889800  |
| C | -11.62057000 | -0.64699700  | -0.18950000 |
| H | -11.83348300 | -1.13841200  | -1.15532000 |
| H | -11.54784600 | -1.44097500  | 0.57142700  |
| O | -12.65368000 | 0.28859500   | 0.12579600  |
| H | -13.50221200 | -0.17066300  | 0.03093700  |

|   |             |             |             |
|---|-------------|-------------|-------------|
| C | 2.98798500  | -0.35153900 | -0.32055000 |
| H | 3.02766900  | -1.29322200 | 0.24306800  |
| H | 2.68508500  | -0.61348500 | -1.34498900 |
| C | 4.34889300  | 0.28916300  | -0.33541200 |
| H | 4.43460900  | 1.21564700  | -0.90881600 |
| C | 5.42763100  | -0.17488000 | 0.30182300  |
| H | 5.34108700  | -1.10189000 | 0.87408000  |
| C | 6.79107800  | 0.46037900  | 0.28678600  |
| H | 6.74941400  | 1.42042400  | -0.24480500 |
| H | 7.11038100  | 0.68494900  | 1.31507200  |
| C | 7.86521900  | -0.44519800 | -0.36540400 |
| H | 7.55278600  | -0.65742700 | -1.39807200 |
| H | 7.89818400  | -1.41011900 | 0.15713400  |
| C | 9.23258400  | 0.17966600  | -0.36698900 |
| H | 9.32825800  | 1.11798800  | -0.91864500 |
| C | 10.30599000 | -0.31033300 | 0.25748700  |
| H | 10.23892100 | -1.25138300 | 0.80463900  |
| C | 11.65117500 | 0.35015300  | 0.28226000  |
| H | 11.88618500 | 0.66678200  | 1.31383900  |
| H | 11.63606500 | 1.25822300  | -0.34219500 |
| O | 12.62572000 | -0.58765600 | -0.17916500 |
| H | 13.50071100 | -0.20415400 | -0.01409900 |

#### Monomer of GAP

Charge = 0; Multiplicity = 1

|   |             |             |             |
|---|-------------|-------------|-------------|
| C | 0.68511800  | 0.34033600  | -0.29962900 |
| H | 0.72078400  | 0.18686600  | -1.38739600 |
| C | -0.06883800 | -0.83136300 | 0.32586800  |
| H | -0.19107000 | -0.64720600 | 1.40233300  |
| H | 0.51159600  | -1.74497000 | 0.19144000  |
| N | -1.37173300 | -1.07527600 | -0.32042600 |
| N | -2.28592800 | -0.29342700 | -0.03221200 |
| N | -3.22921700 | 0.32451300  | 0.14653400  |
| C | 2.11650400  | 0.44346100  | 0.23337700  |
| H | 2.57798800  | 1.35658900  | -0.17760500 |
| H | 2.08256300  | 0.55423100  | 1.32858200  |
| O | 2.82119400  | -0.72488900 | -0.16510100 |
| H | 3.70911800  | -0.69073100 | 0.22026400  |
| O | -0.04027500 | 1.52219800  | 0.03235300  |
| H | 0.15311500  | 2.20147800  | -0.63059600 |

#### Dimer of GAP

Charge = -1; Multiplicity = 1

|   |             |             |             |
|---|-------------|-------------|-------------|
| C | -1.01043500 | 0.79290000  | -0.37851400 |
| C | -1.34038900 | 1.94494000  | 0.56937100  |
| H | -0.39733100 | 2.41512900  | 0.88359800  |
| H | -1.83974900 | 1.53937200  | 1.45982300  |
| O | -2.17325500 | 2.85307600  | -0.14219400 |
| H | -2.48924200 | 3.52254300  | 0.48181400  |
| O | -0.09500200 | -0.03096400 | 0.32300500  |
| C | 0.56786200  | -1.01413300 | -0.45584900 |
| H | -0.11394000 | -1.81688700 | -0.76614600 |
| H | 1.01798300  | -0.56927100 | -1.35495600 |
| C | 1.66350400  | -1.62759400 | 0.41269900  |
| H | 1.19232200  | -2.00596800 | 1.33521800  |

|   |             |             |             |
|---|-------------|-------------|-------------|
| C | 2.71476300  | -0.60529700 | 0.84991100  |
| H | 2.21718000  | 0.18930700  | 1.41787100  |
| H | 3.44574200  | -1.09183800 | 1.51387200  |
| O | 2.20740800  | -2.68707600 | -0.35817400 |
| H | 2.97080800  | -3.05221700 | 0.11482200  |
| N | 3.41533300  | -0.06285200 | -0.33607800 |
| N | 3.96370800  | 1.03058300  | -0.17710900 |
| N | 4.50939300  | 2.03498600  | -0.15914600 |
| C | -2.26575500 | 0.04912200  | -0.84483000 |
| H | -2.93524000 | 0.77712500  | -1.31665200 |
| H | -2.00410400 | -0.71211800 | -1.59103500 |
| N | -2.91300600 | -0.59826200 | 0.31965600  |
| N | -4.08900200 | -0.93313500 | 0.15887800  |
| N | -5.17522300 | -1.28928500 | 0.13735100  |
| H | -0.53335900 | 1.21065800  | -1.28091400 |

### Trimer of GAP

Charge = 0; Multiplicity = 1

|   |             |             |             |
|---|-------------|-------------|-------------|
| C | -2.96800600 | 0.18635900  | 0.53182700  |
| C | -4.13982600 | 0.78377900  | -0.24542200 |
| H | -4.20802500 | 0.28576900  | -1.22221800 |
| H | -3.93573400 | 1.85118400  | -0.41290000 |
| O | -5.31086300 | 0.58479400  | 0.53803200  |
| H | -6.07576100 | 0.85217800  | 0.00799100  |
| C | -3.15331200 | -1.30993900 | 0.80255300  |
| H | -4.08960400 | -1.44183100 | 1.35601200  |
| H | -2.33038500 | -1.68990100 | 1.42180700  |
| H | -2.91105900 | 0.68638800  | 1.51286200  |
| O | -1.80859200 | 0.47451200  | -0.23314200 |
| C | -0.57630000 | 0.36027000  | 0.45764200  |
| H | -0.57992900 | 0.97014200  | 1.37260100  |
| H | -0.35673500 | -0.68030500 | 0.73254100  |
| C | 0.52771400  | 0.85087400  | -0.47985500 |
| O | 1.73950400  | 0.65532600  | 0.22941000  |
| C | 2.92142300  | 0.70010100  | -0.55517200 |
| H | 3.11633000  | 1.70868600  | -0.94335700 |
| H | 2.85736600  | 0.00480800  | -1.40426100 |
| C | 4.08843400  | 0.30288700  | 0.34567000  |
| H | 4.08457800  | 0.97401500  | 1.22078400  |
| O | 5.25253100  | 0.49295000  | -0.44229900 |
| H | 6.01656000  | 0.15418600  | 0.04895200  |
| C | 3.95953000  | -1.12106000 | 0.89012000  |
| H | 3.02889400  | -1.19438200 | 1.46499500  |
| H | 4.79780800  | -1.32986500 | 1.57265400  |
| N | 3.98016000  | -2.09082800 | -0.22764400 |
| N | 3.52608600  | -3.20876000 | 0.03005400  |
| N | 3.13353100  | -4.27645300 | 0.14152000  |
| N | -3.18133200 | -2.04322700 | -0.48380200 |
| N | -3.73465400 | -3.14533200 | -0.45798800 |
| N | -4.21834600 | -4.17547100 | -0.56609800 |
| C | 0.31808600  | 2.30092600  | -0.92580900 |
| H | 1.09765300  | 2.59410200  | -1.64067000 |
| H | -0.65216500 | 2.36661000  | -1.43092300 |
| N | 0.36658700  | 3.18966700  | 0.25756900  |
| N | -0.10586400 | 4.31758500  | 0.09684000  |

|   |             |            |             |
|---|-------------|------------|-------------|
| N | -0.51186200 | 5.38611800 | 0.07638000  |
| H | 0.51296700  | 0.22926400 | -1.39001000 |

### Tetramer of GAP

Charge = 0; Multiplicity = 1

|   |             |             |             |
|---|-------------|-------------|-------------|
| C | 4.71200800  | 0.67735200  | -0.40249100 |
| C | 5.66998200  | 1.57494600  | 0.37915400  |
| H | 5.78172800  | 1.17341500  | 1.39559600  |
| H | 5.22563900  | 2.57833500  | 0.44852200  |
| O | 6.90491100  | 1.59033600  | -0.32716500 |
| H | 7.55442800  | 2.06262600  | 0.21370800  |
| C | 5.23897700  | -0.75456500 | -0.53809100 |
| H | 6.21904400  | -0.71019400 | -1.02586800 |
| H | 4.56712900  | -1.35043500 | -1.16944800 |
| H | 4.61202200  | 1.08058500  | -1.42394000 |
| O | 3.46933300  | 0.75574600  | 0.27760400  |
| C | 2.34770800  | 0.26861900  | -0.43880500 |
| H | 2.28499400  | 0.73022700  | -1.43480800 |
| H | 2.38358800  | -0.82237000 | -0.55985500 |
| C | 1.09606800  | 0.62142200  | 0.36561000  |
| O | 0.00694200  | 0.07955600  | -0.36530100 |
| C | -1.17552600 | -0.14714200 | 0.38398400  |
| H | -1.59320400 | 0.78807400  | 0.78134500  |
| H | -0.98284700 | -0.82793700 | 1.22539300  |
| C | -2.20740300 | -0.77078200 | -0.55629800 |
| H | -2.38222600 | -0.07373500 | -1.39205500 |
| O | -3.38539300 | -0.91352000 | 0.21918900  |
| C | -1.72270900 | -2.08839600 | -1.16809700 |
| H | -0.79332000 | -1.88993800 | -1.71421500 |
| H | -2.46403100 | -2.47069600 | -1.88168900 |
| C | -4.57611700 | -1.15158000 | -0.51591400 |
| H | -4.57604200 | -2.14569000 | -0.98224400 |
| H | -4.71173000 | -0.39582900 | -1.30262900 |
| C | -5.74500200 | -1.08420300 | 0.46416000  |
| O | -6.88953600 | -1.44383000 | -0.29260500 |
| H | -7.67562500 | -1.32864700 | 0.26295100  |
| N | -1.50706700 | -3.07814500 | -0.08861600 |
| N | -0.86795400 | -4.08365200 | -0.40872000 |
| N | -0.29161900 | -5.05602200 | -0.57886900 |
| N | 5.33359200  | -1.37353700 | 0.80403400  |
| N | 6.10832000  | -2.32885500 | 0.89791000  |
| N | 6.79075700  | -3.21968000 | 1.11570100  |
| C | 0.95682900  | 2.12726600  | 0.60714400  |
| H | 0.06431200  | 2.33197700  | 1.21270900  |
| H | 1.83577300  | 2.46835000  | 1.16559400  |
| N | 0.84578800  | 2.82503200  | -0.69379200 |
| N | 1.08960400  | 4.03409400  | -0.67221500 |
| N | 1.29139200  | 5.15363800  | -0.78429500 |
| H | 1.17042300  | 0.13979500  | 1.35371200  |
| C | -5.87679600 | 0.28393600  | 1.13628500  |
| H | -4.95083100 | 0.49697100  | 1.68298000  |
| H | -6.70283700 | 0.25677900  | 1.86347700  |
| N | -6.15195000 | 1.32203100  | 0.11785400  |
| N | -5.88525100 | 2.47913700  | 0.45258200  |
| N | -5.67991900 | 3.58777500  | 0.64079400  |

H -5.55442400 -1.81192200 1.27058100

**Pentamer of GAP**

Charge = 0; Multiplicity = 1

C -2.96721300 0.70530000 -0.36904900  
C -4.07413400 0.06125600 0.46698700  
H -4.05507600 0.47902900 1.48397800  
H -3.87806300 -1.01754100 0.52693700  
O -5.30903100 0.33447200 -0.17272500  
C -3.13728500 2.22178000 -0.49775400  
H -4.11724000 2.41651700 -0.94806200  
H -2.36728800 2.63662300 -1.16103900  
H -3.01255100 0.28837400 -1.38851000  
O -1.75365200 0.32876500 0.26082900  
C -0.57501000 0.54572000 -0.49735500  
H -0.66212600 0.09954100 -1.49839100  
H -0.35320100 1.61557600 -0.60747400  
C 0.58367900 -0.10818700 0.25641700  
O 1.75026000 0.19614600 -0.49246800  
C 2.96705800 0.13997600 0.23384200  
H 3.17389800 -0.87242400 0.60722000  
H 2.94437900 0.82910800 1.09026400  
C 4.09684700 0.54264700 -0.71404400  
H 4.13137400 -0.18094000 -1.54414300  
O 5.28441300 0.46499300 0.05777700  
C 3.88289900 1.92713200 -1.33292700  
H 2.95249000 1.90756100 -1.91109500  
H 4.70803700 2.16355400 -2.01704900  
C 6.48304600 0.29759300 -0.68408500  
H 6.68099200 1.15450500 -1.34197700  
H 6.44015400 -0.61167500 -1.30016300  
C 7.63208200 0.18353700 0.31471300  
O 8.80741000 0.10074900 -0.47508500  
H 9.56441200 -0.04443700 0.11295300  
N 3.82539500 2.94551800 -0.25942200  
N 3.22858700 3.98654800 -0.54443800  
N 2.70310400 4.99212100 -0.68469400  
N -3.02972200 2.84208900 0.84208700  
N -3.46494300 3.99312400 0.93253400  
N -3.83304200 5.05389200 1.14609400  
C -6.47091300 0.02768600 0.58069400  
C -7.63438600 0.67042800 -0.17253700  
H -7.72113800 0.19923900 -1.16107400  
H -7.40771400 1.73699700 -0.31466500  
O -8.80366600 0.47778400 0.61491700  
H -9.56673800 0.77124700 0.09620800  
C 7.46868700 -0.99967300 1.27175600  
H 8.30723700 -1.01012600 1.98458400  
H 6.54159600 -0.86670600 1.84076700  
C 0.38415800 -1.61324100 0.45401900  
H 1.22092300 -2.03365600 1.02712400  
H -0.53593500 -1.76539000 1.03003900  
C -6.67917300 -1.47437700 0.79621300  
H -5.87461900 -1.88605500 1.41936500  
H -7.62813200 -1.61077000 1.32685500



|   |             |             |             |
|---|-------------|-------------|-------------|
| N | 7.45994600  | -2.27054600 | 0.51296000  |
| N | 6.84727700  | -3.20173900 | 1.04111100  |
| N | 6.31159200  | -4.13677200 | 1.42274300  |
| N | 0.29955400  | -2.27121100 | -0.86892100 |
| N | -0.11214100 | -3.43445700 | -0.85890300 |
| N | -0.47775800 | -4.51012800 | -0.98294700 |
| N | -6.69168000 | -2.16243300 | -0.51503200 |
| N | -7.22403700 | -3.27530400 | -0.52805000 |
| N | -7.68830800 | -4.30985400 | -0.67195700 |
| H | -6.40719200 | 0.48800600  | 1.58095700  |
| H | 0.64371200  | 0.34646900  | 1.25805900  |
| H | 7.63312100  | 1.09270800  | 0.93887800  |

### Monomer of AHTPB

Charge = 0; Multiplicity = 1

|   |             |             |             |
|---|-------------|-------------|-------------|
| C | 1.08553100  | 1.60672000  | 0.26708100  |
| H | 0.36545300  | 2.31142800  | -0.16882900 |
| H | 1.01761600  | 1.66605600  | 1.36431900  |
| C | -1.08553600 | -1.60669300 | -0.26683700 |
| H | -0.36559300 | -2.31145100 | 0.16926100  |
| H | -1.01741400 | -1.66613800 | -1.36404800 |
| O | 2.40795700  | 1.85062000  | -0.19191100 |
| H | 2.72438000  | 2.67512400  | 0.20519300  |
| O | -2.40807600 | -1.85046400 | 0.19191700  |
| H | -2.72464900 | -2.67473800 | -0.20554700 |
| C | -0.72486000 | -0.18734500 | 0.17599700  |
| H | -0.85599900 | -0.12888400 | 1.26569200  |
| C | 0.72491200  | 0.18732700  | -0.17585700 |
| H | 0.85576400  | 0.12911600  | -1.26562300 |
| N | 1.58995700  | -0.80674400 | 0.49997600  |
| N | 2.75122400  | -0.90804300 | 0.08492200  |
| N | -1.58994700 | 0.80663900  | -0.50029600 |
| N | -2.75106100 | 0.90822300  | -0.08482400 |
| N | -3.83283100 | 1.13290500  | 0.19670600  |
| N | 3.83281800  | -1.13324100 | -0.19688100 |

### Dimer of AHTPB

Charge = 0; Multiplicity = 1

|   |             |             |             |
|---|-------------|-------------|-------------|
| C | 0.69413800  | -0.24075000 | 0.21522700  |
| H | 0.93318900  | -1.19171600 | -0.27087900 |
| H | 0.71187700  | -0.40932700 | 1.30098300  |
| C | 4.33762800  | 1.19344700  | -0.06936400 |
| H | 4.14453600  | 2.12109600  | 0.48643600  |
| H | 4.35364900  | 1.42347500  | -1.14621900 |
| C | 3.21156500  | 0.19676900  | 0.21239200  |
| H | 3.24041900  | -0.05425700 | 1.28192700  |
| C | 1.81266500  | 0.75145300  | -0.13439800 |
| H | 1.78684600  | 0.96601900  | -1.21193200 |
| N | 1.61574500  | 2.00948500  | 0.64094800  |
| N | 1.34813800  | 3.02187000  | -0.01287900 |
| N | 3.38515600  | -1.02213400 | -0.61063300 |
| N | 4.23593000  | -1.83435700 | -0.22572200 |
| N | 4.96341200  | -2.67873000 | 0.01327500  |
| N | 1.09783100  | 4.02300700  | -0.50347700 |
| C | -0.69464400 | 0.24027500  | -0.21540300 |

|   |             |             |             |
|---|-------------|-------------|-------------|
| H | -0.93350500 | 1.19139000  | 0.27050600  |
| H | -0.71244200 | 0.40862100  | -1.30119300 |
| C | -1.81328700 | -0.75169500 | 0.13456700  |
| H | -1.78748900 | -0.96587800 | 1.21218100  |
| C | -3.21211700 | -0.19699800 | -0.21241400 |
| H | -3.24103400 | 0.05331800  | -1.28211400 |
| C | -4.33827600 | -1.19334000 | 0.07013000  |
| H | -4.14528900 | -2.12142400 | -0.48497300 |
| H | -4.35427000 | -1.42255600 | 1.14715900  |
| N | -1.61678400 | -2.01006500 | -0.64032300 |
| N | -1.34678300 | -3.02173500 | 0.01362300  |
| N | -1.09417400 | -4.02225400 | 0.50430700  |
| N | -3.38541000 | 1.02248500  | 0.60980500  |
| N | -4.23618000 | 1.83454100  | 0.22453400  |
| N | -4.96359800 | 2.67886100  | -0.01485800 |
| O | -5.54357500 | -0.57354800 | -0.35312600 |
| H | -6.28991800 | -1.11195400 | -0.05169700 |
| O | 5.54296700  | 0.57346200  | 0.35348300  |
| H | 6.28927600  | 1.11207900  | 0.05234500  |

### Trimer of AHTPB

Charge = 0; Multiplicity = 1

|   |             |             |             |
|---|-------------|-------------|-------------|
| C | -1.90057500 | 0.48756900  | -0.17326300 |
| H | -1.80746300 | 1.45402400  | 0.33223300  |
| H | -1.89887700 | 0.67549800  | -1.25630200 |
| C | 1.90080400  | -0.48742900 | 0.17354400  |
| H | 1.80757800  | -1.45417300 | -0.33136900 |
| H | 1.89915200  | -0.67471800 | 1.25669600  |
| C | 0.66691400  | 0.35514900  | -0.17711600 |
| H | 0.66411600  | 0.56631600  | -1.25546300 |
| C | -0.66665000 | -0.35513100 | 0.17700200  |
| H | -0.66373600 | -0.56661000 | 1.25528700  |
| N | -0.72709300 | -1.62792500 | -0.59584500 |
| N | -0.70394100 | -2.67295100 | 0.06200900  |
| N | 0.72745400  | 1.62814600  | 0.59536600  |
| N | 0.70254700  | 2.67301700  | -0.06267300 |
| N | 0.68968200  | 3.70211100  | -0.55823800 |
| N | -0.69256400 | -3.70215200 | 0.55738800  |
| C | -3.21785000 | -0.17963300 | 0.23467700  |
| H | -3.32509900 | -1.14145300 | -0.27522900 |
| H | -3.21687500 | -0.37535100 | 1.31610100  |
| C | 3.21808300  | 0.17946700  | -0.23487300 |
| H | 3.21709800  | 0.37440800  | -1.31643800 |
| H | 3.32531300  | 1.14165700  | 0.27434000  |
| C | 4.45353100  | -0.66735300 | 0.09845600  |
| H | 4.44937700  | -0.91475300 | 1.16924200  |
| C | 5.76956700  | 0.07792700  | -0.21839500 |
| H | 5.76819500  | 0.36877800  | -1.27813400 |
| C | -4.45330700 | 0.66741800  | -0.09805700 |
| H | -4.44915000 | 0.91557400  | -1.16866900 |
| C | -5.76933600 | -0.07809700 | 0.21826900  |
| H | -5.76800600 | -0.36959800 | 1.27783000  |
| C | 7.01837800  | -0.76873500 | 0.03664000  |
| H | 7.06465400  | -1.02965800 | 1.10544600  |
| H | 6.95460700  | -1.69555600 | -0.55008500 |

|   |             |             |             |
|---|-------------|-------------|-------------|
| C | -7.01814800 | 0.76870300  | -0.03630300 |
| H | -6.95440100 | 1.69516900  | 0.55098200  |
| H | -7.06438900 | 1.03026600  | -1.10495300 |
| N | 5.77864800  | 1.27817500  | 0.64927800  |
| N | 6.51208900  | 2.21117600  | 0.29791900  |
| N | 7.11941800  | 3.15370000  | 0.09290000  |
| N | 4.40976400  | -1.91629900 | -0.71475000 |
| N | 4.45874500  | -2.98113900 | -0.09120300 |
| N | 4.49604100  | -4.02621100 | 0.36893900  |
| N | -4.40957800 | 1.91577400  | 0.71603700  |
| N | -4.45830300 | 2.98106600  | 0.09323800  |
| N | -4.49529600 | 4.02648100  | -0.36614800 |
| N | -5.77832700 | -1.27781300 | -0.65013200 |
| N | -6.51185900 | -2.21100600 | -0.29946300 |
| N | -7.11921600 | -3.15365600 | -0.09511600 |
| O | -8.12955800 | -0.02072400 | 0.35986800  |
| H | -8.94105100 | 0.41789800  | 0.06509700  |
| O | 8.12977400  | 0.02045000  | -0.36004400 |
| H | 8.94128500  | -0.41810900 | -0.06522800 |

#### Tetramer of AHTPB

Charge = 0; Multiplicity = 1

|   |             |             |             |
|---|-------------|-------------|-------------|
| C | -4.47813000 | -0.51412100 | 0.15133800  |
| H | -4.42247700 | -1.47168600 | -0.37609000 |
| H | -4.47824000 | -0.72627100 | 1.22989400  |
| C | -0.65084800 | 0.35077600  | -0.20035100 |
| H | -0.71223800 | 1.31974300  | 0.30394200  |
| H | -0.65256400 | 0.53745200  | -1.28360700 |
| C | -1.90531500 | -0.45740700 | 0.15604100  |
| H | -1.90828000 | -0.67149600 | 1.23388100  |
| C | -3.21878500 | 0.29560400  | -0.18706000 |
| H | -3.21028500 | 0.52366900  | -1.26191600 |
| N | -3.23909400 | 1.55748900  | 0.60586400  |
| N | -3.19560000 | 2.61166500  | -0.03636400 |
| N | -1.87548200 | -1.72918600 | -0.61984200 |
| N | -2.03495500 | -2.77083400 | 0.02514200  |
| N | -2.16645000 | -3.79702700 | 0.50891800  |
| N | -3.16245900 | 3.64759900  | -0.51637700 |
| C | -5.77429400 | 0.20571500  | -0.23483700 |
| H | -5.84677500 | 1.15876800  | 0.29683800  |
| H | -5.77153100 | 0.42546400  | -1.31165800 |
| C | 0.65128200  | -0.35087300 | 0.20046000  |
| H | 0.65299300  | -0.53757600 | 1.28371100  |
| H | 0.71265600  | -1.31983200 | -0.30385600 |
| C | 1.90573100  | 0.45735100  | -0.15591600 |
| H | 1.90867500  | 0.67146600  | -1.23375000 |
| C | 3.21924500  | -0.29559800 | 0.18717400  |
| H | 3.21077800  | -0.52364200 | 1.26203500  |
| C | -7.03566100 | -0.60699700 | 0.08536100  |
| H | -7.03573900 | -0.87761100 | 1.15057800  |
| C | -8.32754300 | 0.18808900  | -0.21033400 |
| H | -8.32188800 | 0.49690500  | -1.26496000 |
| C | 4.47854800  | 0.51416900  | -0.15126500 |
| H | 4.47867000  | 0.72619900  | -1.22984400 |
| H | 4.42281500  | 1.47178300  | 0.37606300  |

|   |              |             |             |
|---|--------------|-------------|-------------|
| C | -9.60304300  | -0.62005200 | 0.03762000  |
| H | -9.57364500  | -1.53943500 | -0.56346000 |
| H | -9.65341800  | -0.89567100 | 1.10250700  |
| N | 3.23972200   | -1.55749800 | -0.60571900 |
| N | 3.19471400   | -2.61164600 | 0.03645300  |
| N | 3.16006400   | -3.64755900 | 0.51640400  |
| N | 1.87582600   | 1.72911000  | 0.62000200  |
| N | 2.03520700   | 2.77078800  | -0.02495900 |
| N | 2.16651500   | 3.79700800  | -0.50872700 |
| N | -7.03296700  | -1.83862700 | -0.75475200 |
| N | -7.14815100  | -2.91309600 | -0.15668300 |
| N | -7.24680500  | -3.96475900 | 0.27852800  |
| N | -8.29143400  | 1.37280900  | 0.67777200  |
| N | -8.99624200  | 2.33519100  | 0.34743100  |
| N | -9.57359600  | 3.30042300  | 0.16262500  |
| O | -10.68888300 | 0.21194200  | -0.34170800 |
| H | -11.51333000 | -0.20236000 | -0.04767300 |
| C | 5.77473200   | -0.20557300 | 0.23502000  |
| H | 5.84710100   | -1.15881900 | -0.29632300 |
| H | 5.77207000   | -0.42495200 | 1.31191600  |
| C | 7.03611600   | 0.60694900  | -0.08561500 |
| H | 7.03618800   | 0.87703100  | -1.15096600 |
| C | 8.32798600   | -0.18799300 | 0.21047600  |
| H | 8.32241900   | -0.49610800 | 1.26530700  |
| C | 9.60346600   | 0.61997600  | -0.03812200 |
| H | 9.65378500   | 0.89482200  | -1.10321100 |
| H | 9.57405200   | 1.53979100  | 0.56229100  |
| O | 10.68933800  | -0.21172900 | 0.34175200  |
| H | 11.51376300  | 0.20236100  | 0.04735400  |
| N | 7.03368100   | 1.83900600  | 0.75388600  |
| N | 7.14676200   | 2.91328100  | 0.15507000  |
| N | 7.24371100   | 3.96481000  | -0.28084900 |
| N | 8.29177300   | -1.37329900 | -0.67684000 |
| N | 8.99668800   | -2.33543600 | -0.34601600 |
| N | 9.57426800   | -3.30046700 | -0.16086600 |

### Pentamer of AHTPB

Charge = 0; Multiplicity = 1

|   |             |             |             |
|---|-------------|-------------|-------------|
| C | -7.05020100 | 0.51036300  | -0.13977800 |
| H | -7.01051500 | 1.46138300  | 0.40074100  |
| H | -7.05026000 | 0.73718100  | -1.21534400 |
| C | -3.21259100 | -0.30729700 | 0.21113300  |
| H | -3.26094800 | -1.27148500 | -0.30333500 |
| H | -3.21389900 | -0.50530900 | 1.29238800  |
| C | -4.47630000 | 0.48891200  | -0.13896400 |
| H | -4.47933400 | 0.71586900  | -1.21420000 |
| C | -5.78044600 | -0.28609200 | 0.19142300  |
| H | -5.77123000 | -0.52777900 | 1.26328900  |
| N | -5.78126200 | -1.53789600 | -0.61765000 |
| N | -5.72873200 | -2.59957000 | 0.01148100  |
| N | -4.46237200 | 1.75141800  | 0.65204400  |
| N | -4.66174900 | 2.79645100  | 0.02354400  |
| N | -4.82943500 | 3.82469900  | -0.44422500 |
| N | -5.68578100 | -3.64099700 | 0.47862700  |
| C | -8.33703700 | -0.23319400 | 0.23255500  |

|   |              |             |             |
|---|--------------|-------------|-------------|
| H | -8.39362400  | -1.18043600 | -0.31120600 |
| H | -8.33490800  | -0.46633500 | 1.30656500  |
| C | -1.91832400  | 0.41440100  | -0.17994100 |
| H | -1.91652500  | 0.61069300  | -1.26147400 |
| H | -1.87316100  | 1.37972800  | 0.33305600  |
| C | -0.65512900  | -0.38180500 | 0.17345500  |
| H | -0.64886900  | -0.59737900 | 1.25096200  |
| C | 0.65271100   | 0.38133700  | -0.17193100 |
| H | 0.64652000   | 0.59657000  | -1.24950600 |
| C | -9.60902900  | 0.56477300  | -0.08232400 |
| H | -9.60957800  | 0.84791600  | -1.14429800 |
| C | -10.89015100 | -0.25250500 | 0.19992900  |
| H | -10.88425800 | -0.57115600 | 1.25162000  |
| C | 1.91594300   | -0.41466500 | 0.18181200  |
| H | 1.91444500   | -0.60994700 | 1.26352600  |
| H | 1.87065200   | -1.38047500 | -0.33026500 |
| C | -12.17650900 | 0.53887900  | -0.04602700 |
| H | -12.16335100 | 1.45322800  | 0.56329200  |
| H | -12.22664100 | 0.82319900  | -1.10862600 |
| N | 0.67115600   | 1.65249900  | 0.60564500  |
| N | 0.50438300   | 2.69363100  | -0.03849500 |
| N | 0.36490800   | 3.71910700  | -0.52145100 |
| N | -0.67376100  | -1.65271800 | -0.60451000 |
| N | -0.50680000  | -2.69404900 | 0.03926700  |
| N | -0.36761200  | -3.71969200 | 0.52194400  |
| N | -9.62610600  | 1.78631800  | 0.77211800  |
| N | -9.76626300  | 2.86513700  | 0.18727000  |
| N | -9.88845300  | 3.91956900  | -0.23501900 |
| N | -10.83273800 | -1.42809900 | -0.69915200 |
| N | -11.52465000 | -2.40381900 | -0.38080900 |
| N | -12.08845400 | -3.37911800 | -0.20743600 |
| O | -13.25140100 | -0.31234700 | 0.32148400  |
| H | -14.08069600 | 0.09207300  | 0.02730900  |
| C | 3.21009700   | 0.30664600  | -0.21033800 |
| H | 3.25874400   | 1.27133200  | 0.30316000  |
| H | 3.21108200   | 0.50359100  | -1.29179000 |
| C | 4.47394700   | -0.48912300 | 0.14011100  |
| H | 4.47709700   | -0.71553800 | 1.21546400  |
| C | 5.77781400   | 0.28610000  | -0.19073500 |
| H | 5.76792700   | 0.52824600  | -1.26248800 |
| C | 7.04787200   | -0.51025500 | 0.13947000  |
| H | 7.04828100   | -0.73811700 | 1.21481000  |
| H | 7.00861000   | -1.46079400 | -0.40192200 |
| N | 4.45995500   | -1.75205800 | -0.65020900 |
| N | 4.66230900   | -2.79646900 | -0.02164900 |
| N | 4.83209000   | -3.82426700 | 0.44636300  |
| N | 5.77834000   | 1.53765200  | 0.61884600  |
| N | 5.73076600   | 2.59962000  | -0.01016200 |
| N | 5.69270200   | 3.64124100  | -0.47731400 |
| C | 8.33449700   | 0.23390300  | -0.23235600 |
| H | 8.39192700   | 1.17989300  | 0.31348900  |
| H | 8.33150600   | 0.46948000  | -1.30584200 |
| C | 9.60642800   | -0.56519800 | 0.07948300  |
| H | 9.60708400   | -0.85206900 | 1.14047000  |
| C | 10.88748500  | 0.25336400  | -0.19993300 |

|   |             |             |             |
|---|-------------|-------------|-------------|
| H | 10.88040400 | 0.57775200  | -1.24986200 |
| C | 12.17433100 | -0.53904400 | 0.04029500  |
| H | 12.22539100 | -0.82986100 | 1.10110100  |
| H | 12.16140900 | -1.44968300 | -0.57460000 |
| O | 13.24854600 | 0.31487400  | -0.32279000 |
| H | 14.07844600 | -0.09223600 | -0.03405500 |
| N | 9.62132200  | -1.78373800 | -0.77919200 |
| N | 9.77984700  | -2.86317600 | -0.20016700 |
| N | 9.91746300  | -3.91784200 | 0.21671100  |
| N | 10.83102700 | 1.42404100  | 0.70562500  |
| N | 11.52216500 | 2.40170500  | 0.39157100  |
| N | 12.08554600 | 3.37803100  | 0.22266600  |

PBC-HTPB

|    |           |           |           |
|----|-----------|-----------|-----------|
| 6  | 0.549053  | 0.545983  | -0.010446 |
| 1  | 0.229444  | 1.364462  | 0.651115  |
| 1  | 0.623164  | 0.971218  | -1.020237 |
| 6  | 4.336234  | -0.522512 | 0.100155  |
| 1  | 4.655506  | -1.341365 | -0.561169 |
| 1  | 4.262404  | -0.947564 | 1.110068  |
| 6  | 2.991864  | -0.006610 | -0.334940 |
| 1  | 2.937359  | 0.380918  | -1.355380 |
| 6  | 1.893428  | 0.030052  | 0.424919  |
| 1  | 1.947614  | -0.357322 | 1.445420  |
| 6  | -0.549043 | -0.545990 | 0.010420  |
| 1  | -0.229433 | -1.364469 | -0.651142 |
| 1  | -0.623154 | -0.971224 | 1.020211  |
| 6  | -1.893417 | -0.030059 | -0.424947 |
| 1  | -1.947606 | 0.357299  | -1.445454 |
| 6  | -2.991849 | 0.006623  | 0.334917  |
| 1  | -2.937343 | -0.380889 | 1.355363  |
| 6  | -4.336218 | 0.522526  | -0.100180 |
| 1  | -4.655488 | 1.341381  | 0.561142  |
| 1  | -4.262388 | 0.947574  | -1.110095 |
| -2 | 9.770822  | 0.046579  | 0.178874  |

PBC-GAP

|   |           |           |           |
|---|-----------|-----------|-----------|
| 6 | 1.446793  | 0.572173  | 0.009696  |
| 6 | 2.591479  | -0.437404 | 0.106061  |
| 1 | 2.391133  | -1.253466 | -0.600790 |
| 1 | 2.630369  | -0.853823 | 1.122806  |
| 8 | 0.264503  | -0.178973 | 0.230279  |
| 6 | -0.949225 | 0.478216  | -0.095498 |
| 1 | -1.172765 | 1.290187  | 0.609201  |
| 1 | -0.911469 | 0.894781  | -1.112238 |
| 6 | -2.072318 | -0.556135 | -0.007571 |
| 1 | -2.075953 | -0.980681 | 1.009761  |
| 6 | -1.870764 | -1.722856 | -0.978835 |
| 1 | -0.902256 | -2.185725 | -0.756802 |
| 1 | -2.652081 | -2.480152 | -0.832696 |
| 8 | -3.268701 | 0.168363  | -0.240653 |
| 7 | -1.915398 | -1.213707 | -2.367692 |
| 7 | -1.509669 | -1.995213 | -3.232796 |
| 7 | -1.161098 | -2.622356 | -4.122139 |
| 6 | 1.613537  | 1.740870  | 0.985066  |

|    |          |          |           |
|----|----------|----------|-----------|
| 1  | 2.573818 | 2.225300 | 0.773362  |
| 1  | 0.817432 | 2.481403 | 0.832907  |
| 7  | 1.566799 | 1.227839 | 2.372420  |
| 7  | 1.944194 | 2.017176 | 3.243225  |
| 7  | 2.267371 | 2.650949 | 4.137441  |
| 1  | 1.443374 | 0.998685 | -1.006796 |
| -2 | 7.061946 | 0.077767 | 0.030754  |

PBC-AHTPB

|    |           |           |           |
|----|-----------|-----------|-----------|
| 6  | 0.640511  | 0.420820  | 0.000000  |
| 1  | 0.663012  | 1.043625  | 0.899086  |
| 1  | 0.642811  | 1.091371  | -0.870925 |
| 6  | 4.488646  | -0.420232 | -0.000989 |
| 1  | 4.467510  | -1.043806 | -0.899593 |
| 1  | 4.484027  | -1.090087 | 0.870456  |
| 6  | 3.211630  | 0.429787  | 0.030889  |
| 1  | 3.208406  | 1.116588  | -0.826880 |
| 6  | 1.918018  | -0.428264 | -0.035138 |
| 1  | 1.922415  | -1.116928 | 0.821131  |
| 7  | 1.927551  | -1.195568 | -1.312434 |
| 7  | 2.145673  | -2.408812 | -1.224126 |
| 7  | 3.201177  | 1.199906  | 1.306460  |
| 7  | 2.984180  | 2.413106  | 1.214882  |
| 7  | 2.798186  | 3.538909  | 1.259348  |
| 7  | 2.332617  | -3.534326 | -1.271805 |
| 6  | -0.640515 | -0.420816 | 0.000027  |
| 1  | -0.663004 | -1.043636 | -0.899048 |
| 1  | -0.642824 | -1.091352 | 0.870963  |
| 6  | -1.918025 | 0.428266  | 0.035130  |
| 1  | -1.922418 | 1.116901  | -0.821162 |
| 6  | -3.211634 | -0.429790 | -0.030877 |
| 1  | -3.208416 | -1.116559 | 0.826918  |
| 6  | -4.488650 | 0.420229  | 0.000960  |
| 1  | -4.467522 | 1.043826  | 0.899548  |
| 1  | -4.484017 | 1.090061  | -0.870503 |
| 7  | -1.927584 | 1.195612  | 1.312402  |
| 7  | -2.145643 | 2.408861  | 1.224039  |
| 7  | -2.332539 | 3.534387  | 1.271667  |
| 7  | -3.201170 | -1.199956 | -1.306420 |
| 7  | -2.984194 | -2.413158 | -1.214793 |
| 7  | -2.798216 | -3.538965 | -1.259214 |
| -2 | 10.259060 | 0.000000  | 0.000000  |
